# Supplementary material for: Long-Term Diet Supplementation with Lactobacillus paracasei K71 Prevents Age-Related Cognitive Decline in Senescence-Accelerated Mouse Prone 8
Source: MDPI journal article supplement (doi:10.3390/nu10060762), 2018-06-13
Supplement: s1 [file s1]

# Supporting Information

## Long-Term Diet Supplementation with *Lactobacillus paracasei* K71 Prevents Age-Related Cognitive Decline in Senescence-Accelerated Mouse Prone 8

Henry Marzo Corpuz, Saki Ichikawa, Misa Arimura, Toshihiro Mihara,  
Takehisa Kumagai, Takakazu Mitani, Soichiro Nakamura and Shigeru Katayama \*

\*Shigeru Katayama, PhD

skata@shinshu-u.ac.jp; Tel.: +81-265-77-1603

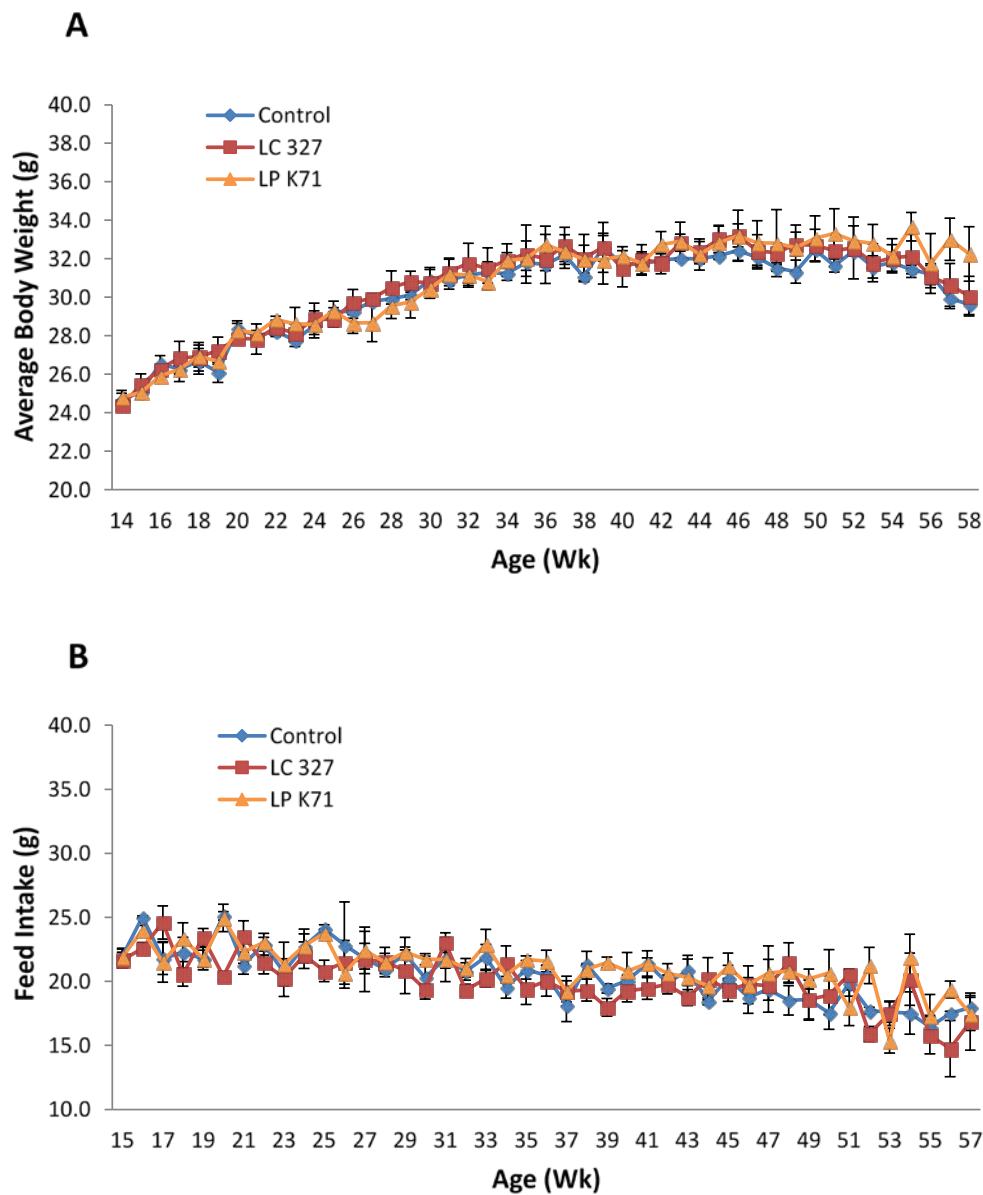

**Figure S1.** Changes in body weight (A) and feed intake (B) in mice. Data are expressed as mean  $\pm$  SEM,  $n = 12$ /group.

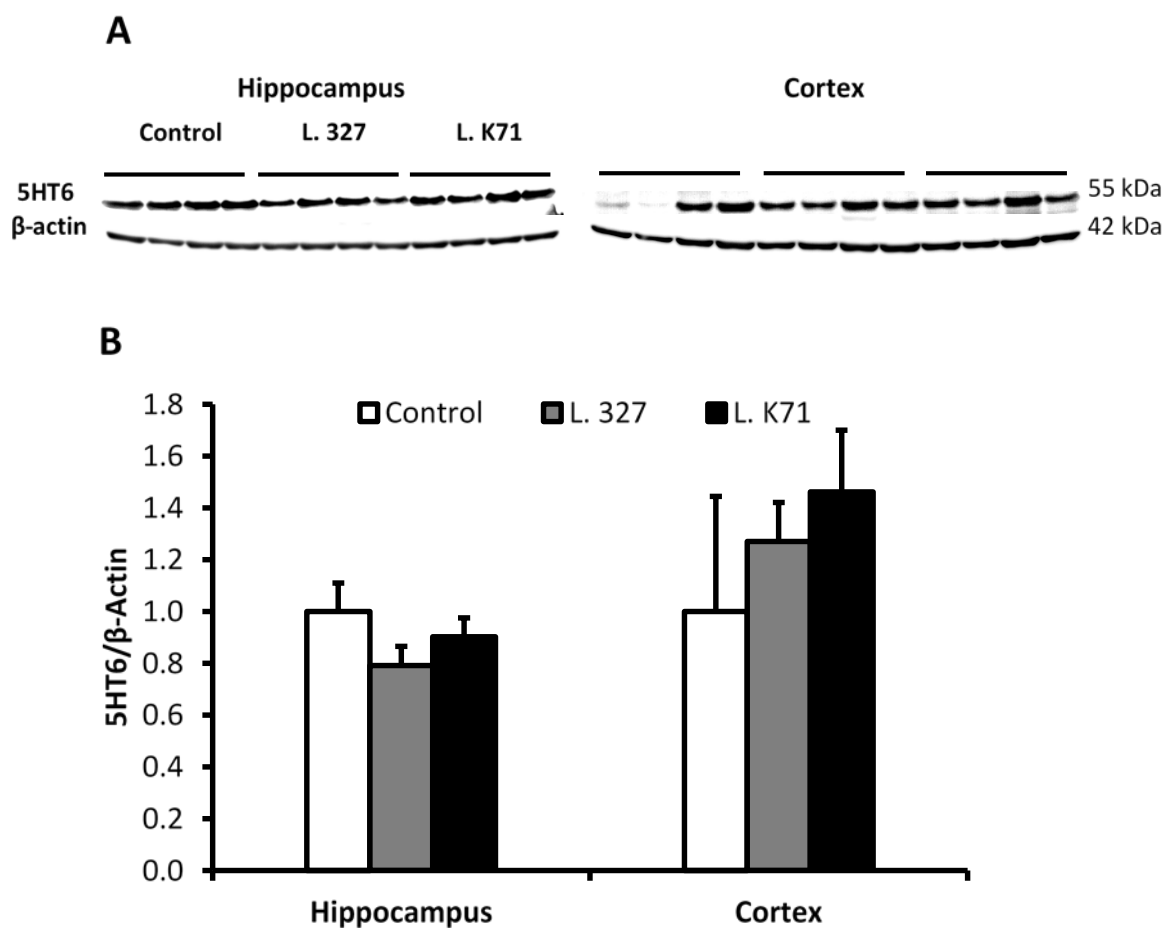

**Figure S2.** Effects of 43-week *Lactobacillus* strain administration on the expression levels of 5-HT6 receptor protein in the hippocampus and cortex of SAMP8. **(A)** Western blotting analysis (n = 4 mice per group) of the protein levels of 5-HT6 receptor; **(B)** Quantification of band intensities in (A). Data are expressed as mean  $\pm$  SEM.
